# Supplementary material for: Material balance in the O2 electrode of Li–O2 cells with a porous carbon electrode and TEGDME-based electrolytes
Source: Royal Society of Chemistry journal article supplement (doi:10.1039/d0ra07924c), 2020-01-01
Supplement: d0ra07924c1.pdf [file d0ra07924c1.pdf]

## Material Balance in the O<sub>2</sub> Electrode of Li-O<sub>2</sub> Cells with a Porous Carbon Electrode and TEGDME-Based Electrolytes

Makoto Ue,<sup>a,\*</sup> Hitoshi Asahina,<sup>ab</sup> Shoichi Matsuda,<sup>ab</sup> and Kohei Uosaki<sup>ab</sup>

<sup>a</sup> Center for Green Research on Energy and Environmental Materials, National Institute for Materials Science (NIMS)

<sup>b</sup> SoftBank-NIMS Advanced Technologies Development Center  
1-1 Namiki, Tsukuba, Ibaraki 305-0044, Japan.

\*Corresponding author

E-mail: macue01@gmail.com

We used a typical porous carbon electrode based on a Ketjenblack, which is a proprietary self-standing sheet consisting of a Ketjenblack and a carbon fiber (250 mm thick, 7 mgcm<sup>-2</sup>-carbon). This porous carbon electrode has large pore volume in mesopore region as shown in Fig. S1.

The cycle life of Li-O<sub>2</sub> cells was much lower than those expected from the electrolyte dry-up, which were simply calculated from average TEGDME consumption rates. The cause of the early failure is the by-product accumulation in the carbon electrode, which results in large potential polarization by pore clogging. This pore clogging was confirmed by a scanning electron microscope, Fourier transform infrared spectroscopy and impedance spectroscopy in Figs. S2, S3 and S4, respectively. The results were given for the Li-O<sub>2</sub> cell with 0.5 M LiTFSI + 0.5 M LiNO<sub>3</sub> + 0.2 M LiBr/TEGDME at 0.4 mAcm<sup>-2</sup>.

Compared to the SEM images of a pristine porous carbon electrode in Fig. S2a, the surface of the electrode was completely covered by a product layer after cycling as shown in Fig. S2b. The porous structure was almost completely clogged by product deposits, which may include Li<sub>2</sub>O<sub>2</sub> and LiOH.<sup>23</sup>

FT-IR spectra in Fig. S3 demonstrated that Li<sub>2</sub>O<sub>2</sub> was accompanied by many other peaks that confirm extensive electrolyte decomposition. Although it is difficult to identify the all products by FT-IR only, Fig. S3b revealed the presence of Li<sub>2</sub>CO<sub>3</sub>.<sup>25</sup>

Electrochemical impedance spectra in Fig. S4 clearly reflected the increase of the impedance after cycling, which was observed continuously during cycling.<sup>29</sup>

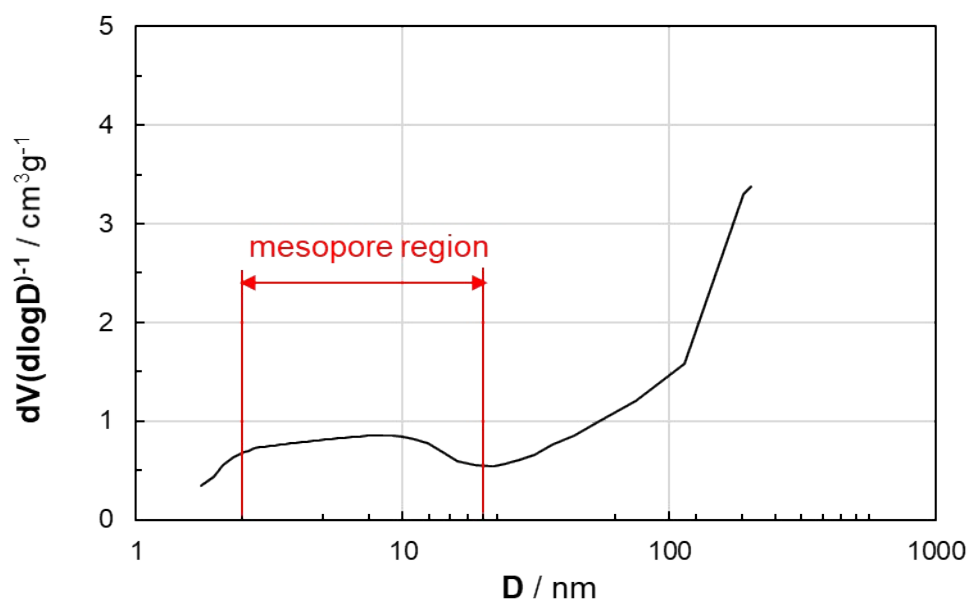

Fig. S1 Pore size distribution of the pristine porous carbon electrode consisting of a Ketjenblack and a carbon fiber (250  $\mu\text{m}$  thick, 7  $\text{mgcm}^{-2}$ -carbon).  $D$ ; pore diameter,  $dV(d\log D)^{-1}$ ; pore volume.

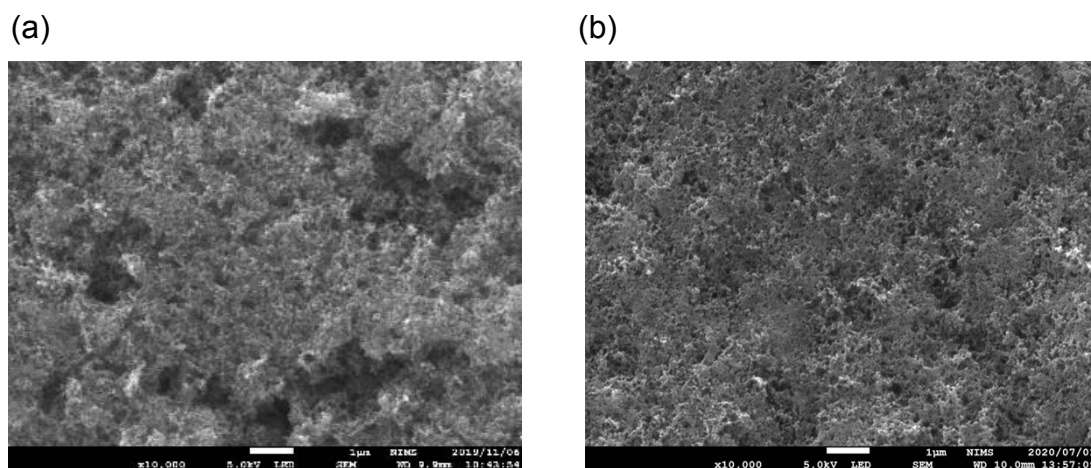

Fig. S2 SEM images of the porous carbon electrode (a) before and (b) after cycling.

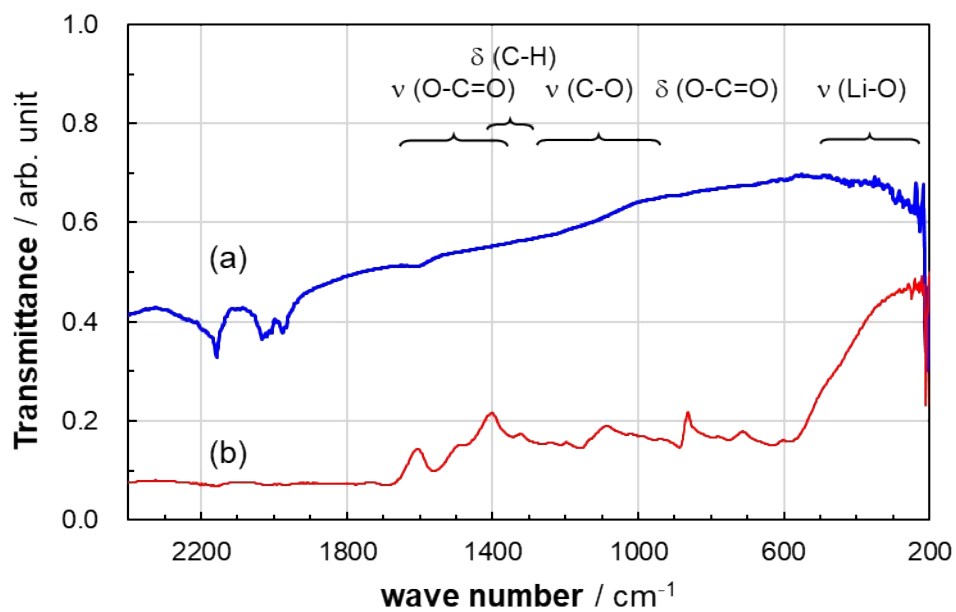

Fig. S3 FT-IR spectra of the porous carbon electrode (a) before and (b) after cycling.

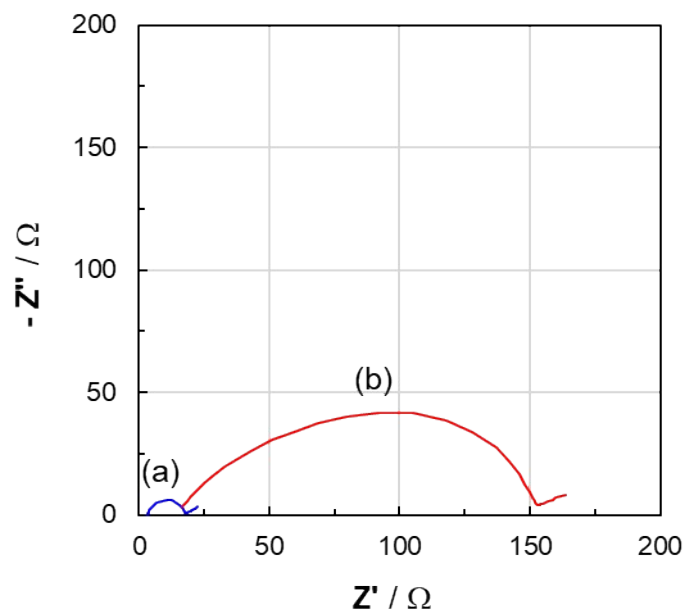

Fig. S4 Nyquist plots of the  $\text{Li}/\text{O}_2$  cell (a) before and (b) after cycling.
